# Supplementary material for: Polymorphisms in the WNK1 Gene Are Associated with Blood Pressure Variation and Urinary Potassium Excretion
Source: PLoS One. 2009 Apr 4;4(4):e5003. doi: 10.1371/journal.pone.0005003 (PMC2661139; doi:10.1371/journal.pone.0005003)
Supplement: Table S1 — Haplotype association analysis (0.04 MB XLS) [file pone.0005003.s003.xls]

## Sheet: Sheet1
WNK1 Haplotype	HAPN	F	NT	HT	BETA_EH	SE_EH	Z_EH	P_EH	BETA_SBP	SE_SBP	Z_SBP	P_SBP	BETA_DBP	SE_DBP	Z_DBP	P_DBP	BETA_UrK	SE_UrK	Z_UrK	P_UrK
111111111112111211211111	1	0.14627	477.526	513.911	REF	REF	REF	REF	REF	REF	REF	REF	REF	REF	REF	REF	REF	REF	REF	REF
211121211111211112111111	2	0.12653	405.619	451.965	0.02823	0.09981	0.283	0.777317	0.0117962	0.0062396	1.891	0.058743	0.009982	0.00585	1.706	0.088005	0.0805773	0.0206487	3.902	9.83e-05
211112111122111211211211	3	0.12089	368.267	451.103	0.1414	0.102	1.386	0.165728	0.0145724	0.0064074	2.274	0.022987	0.01363	0.006007	2.269	0.023292	0.10384	0.0207043	5.015	5.73e-07
122221122111111121122111	4	0.11934	407.944	400.936	-0.08888	0.1023	-0.869	0.384889	-0.0066091	0.0063779	-1.036	0.300131	-0.009567	0.00598	-1.6	0.109667	0.0902121	0.0214217	4.211	2.65e-05
111111111112111121112121	5	0.10523	307.268	405.999	0.1439	0.1062	1.355	0.175528	0.016639	0.006692	2.486	0.012935	0.01435	0.006274	2.288	0.022203	-0.0006067	0.0220469	-0.028	0.978048
122221112111121121122111	6	0.05879	193.125	205.319	0.004784	0.1261	0.038	0.96974	-0.0090139	0.0079016	-1.141	0.254016	-5.723e-05	0.007408	-0.008	0.993837	0.0911986	0.0260296	3.504	0.000469
212111112211111211111112	7	0.05656	188.666	194.683	0.0003126	0.1298	0.002	0.998078	-0.003337	0.0080946	-0.412	0.680176	0.003068	0.007589	0.404	0.686057	0.131937	0.0269143	4.902	1.02e-06
211112111122112211211211	8	0.05289	163.333	195.168	0.04561	0.1345	0.339	0.73444	0.0174713	0.0084642	2.064	0.039054	0.01756	0.007936	2.213	0.026933	0.051293	0.0281464	1.822	0.068542
211112122111111121122111	9	0.03421	124.032	107.818	-0.1495	0.1556	-0.96	0.336831	-0.003017	0.009672	-0.312	0.755104	-0.01278	0.009068	-1.409	0.158923	0.100396	0.0368347	2.726	0.006472
111221111212111121212121	10	0.01427	42.6011	54.1396	0.09341	0.2237	0.418	0.676266	0.0121657	0.014017	0.868	0.385478	0.01698	0.01314	1.292	0.196356	0.0696688	0.046235	1.507	0.132001
111111111112112121112121	11	0.01013	30.9544	37.6935	0.2164	0.2704	0.8	0.423676	0.0424439	0.0167973	2.527	0.011539	0.03764	0.01575	2.39	0.016893	0.0171427	0.0555158	0.309	0.757512
111112111122111211211111	12	0.00968	32.2849	33.3091	0.004971	0.2748	0.018	0.985565	-0.0298198	0.0183059	-1.629	0.103381	-0.01905	0.01716	-1.11	0.267017	0.143579	0.054336	2.642	0.008292
122221122111112121122111	13	0.00862	31.1846	27.2514	-0.09912	0.289	-0.343	0.731633	0.0043053	0.0173861	0.248	0.804433	0.01354	0.0163	0.831	0.406196	0.117107	0.0623714	1.878	0.060578
211112111112111211211211	14	0.00824	54.1176	1.72421	-3.558	0.7915	-4.495	6.97e-06	-0.120147	0.0168037	-7.15	9.87e-13	-0.1118	0.01575	-7.096	1.45e-12	0.137672	0.225289	0.611	0.541205
111111111112111121112111	15	0.00818	53.8204	1.60925	-3.358	0.8167	-4.111	3.94e-05	-0.103779	0.01713	-6.058	1.47e-09	-0.09388	0.01606	-5.846	5.35e-09	0.104554	0.238216	0.439	0.660776
211121211111111121112111	16	0.00782	26.1568	26.8747	-0.1323	0.3109	-0.426	0.670402	0.004795	0.0195834	0.245	0.806582	0.002467	0.01836	0.134	0.89314	0.0972139	0.0699622	1.39	0.164821
211121211122112211211211	17	0.00502	14.6359	19.3704	0.177	0.3713	0.477	0.633673	0.0146923	0.0222799	0.659	0.509641	0.02152	0.02089	1.03	0.303035	0.230259	0.0776212	2.966	0.003047
211112111112112211211211	18	0.00396	26.5093	0.355909	-4.235	1.708	-2.479	0.013158	-0.12072	0.0229373	-5.263	1.47e-07	-0.1393	0.02151	-6.477	1.02e-10	0.0440983	0.671706	0.066	0.947662
111111111122111211211111	19	0.00377	23.991	1.55533	-2.889	0.8471	-3.411	0.000648	-0.136187	0.0255899	-5.322	1.07e-07	-0.1254	0.02399	-5.225	1.81e-07	0.498247	0.230099	2.165	0.030472
111121211111211221112121	20	0.00338	7.19284	15.7172	0.587	0.4953	1.185	0.236028	0.0051958	0.0331626	0.157	0.875505	0.0216	0.03109	0.695	0.487213	0.0727136	0.0879422	0.827	0.408425
211121211121211112111111	21	0.0029	19.4301	0.240868	-4.679	2.085	-2.244	0.02482	-0.114794	0.0287429	-3.994	6.59e-05	-0.1403	0.02695	-5.205	2.01e-07	0.114624	0.675325	0.17	0.865238
211121211111211112111121	22	0.00278	18.6348	0.229333	-4.436	2.142	-2.071	0.038325	-0.0986672	0.0274617	-3.593	0.00033	-0.08295	0.02575	-3.222	0.001282	0.0283761	0.65925	0.043	0.965671
211111111112111211211111	23	0.00272	6.70144	11.7034	0.3003	0.5378	0.558	0.57661	0.0516792	0.0332829	1.553	0.12055	0.03155	0.03121	1.011	0.311989	0.102124	0.125234	0.815	0.414899
111111111112111211211121	24	0.00264	16.9438	0.981401	-2.775	1.058	-2.623	0.008724	-0.0799083	0.0281108	-2.843	0.004492	-0.09308	0.02636	-3.532	0.000417	0.115058	0.65698	0.175	0.860993
111111111112112211211111	25	0.00257	10.2151	7.20544	-0.2984	0.5111	-0.584	0.559395	-0.001422	0.0316521	-0.045	0.964169	0.002604	0.02968	0.088	0.930076	-0.196417	0.109168	-1.799	0.072128
111111111122111121112121	26	0.00256	17.0819	0.253993	-4.119	2.032	-2.027	0.042651	-0.0951645	0.0304455	-3.126	0.001783	-0.1077	0.02854	-3.772	0.000163	0.102793	0.831197	0.124	0.901589
122221111111111121122111	27	0.00252	6.0205	11.0394	0.9054	0.5471	1.655	0.097927	0.0531961	0.0311914	1.705	0.088165	0.04364	0.02924	1.492	0.135713	-0.112154	0.0910617	-1.232	0.218227
111111111112111211211211	28	0.00246	7.48023	9.16055	0.09851	0.5066	0.194	0.845827	0.0077557	0.0315628	0.246	0.805906	-0.02146	0.02959	-0.725	0.468301	0.160309	0.102148	1.569	0.116708
211121211111211112211111	29	0.00242	6.32058	10.0945	0.6628	0.5622	1.179	0.238477	0.0687952	0.0323349	2.128	0.033418	0.03989	0.03032	1.316	0.18835	0.111736	0.0962649	1.161	0.245888
211112111122111211211111	30	0.00238	9.6524	6.45175	-0.3284	0.5759	-0.57	0.568469	-0.035474	0.0355972	-0.997	0.319034	-0.01934	0.03337	-0.58	0.562258	0.0407732	0.134244	0.304	0.761368
111111111112112121112111	31	0.00236	14.5308	1.44035	-2.107	0.8965	-2.35	0.018776	-0.11886	0.0316888	-3.751	0.000178	-0.08484	0.02971	-2.856	0.004312	0.131936	0.231044	0.571	0.568031
111112122111111121122111	32	0.00208	5.30422	8.77736	0.3813	0.5673	0.672	0.501556	0.0386749	0.0360554	1.073	0.283476	0.04615	0.0338	1.365	0.172269	0.0842234	0.115065	0.732	0.464272
211112111122111211211221	33	0.00203	13.5975	0.17085	-4.191	2.461	-1.703	0.088536	-0.0985749	0.0336866	-2.926	0.003446	-0.09206	0.03158	-2.915	0.003574	0.17104	0.759405	0.225	0.821823
111221111212111121212111	34	0.002	13.3346	0.194307	-3.914	2.311	-1.694	0.090329	-0.121108	0.0339719	-3.565	0.000367	-0.1169	0.03185	-3.67	0.000245	-0.0146215	1.22522	-0.012	0.99048
212111112211112211111112	35	0.00176	5.00227	6.91366	0.3873	0.6436	0.602	0.547287	0.0317265	0.0423006	0.75	0.453273	0.04315	0.03966	1.088	0.276678	0.271061	0.122595	2.211	0.027141
112111112211111211111112	36	0.00174	7.27876	4.49828	-0.3485	0.6201	-0.562	0.57416	-0.0402798	0.0380779	-1.058	0.290184	-0.01471	0.0357	-0.412	0.680426	0.11707	0.222939	0.525	0.599554
111121211111211112111111	37	0.00173	10.0618	1.69552	-2.142	0.8715	-2.457	0.013995	-0.0769958	0.0371955	-2.07	0.038499	-0.1116	0.03487	-3.2	0.001384	0.167893	0.20891	0.804	0.421682
122221122111111121112121	38	0.00173	8.11151	3.59214	-0.9703	0.6602	-1.47	0.141681	-0.0728603	0.0380581	-1.914	0.055617	-0.1055	0.03568	-2.955	0.003136	0.326947	0.142968	2.287	0.022303
122221122121111121122111	39	0.00166	11.0621	0.219988	-3.707	2.17	-1.708	0.08757	-0.133799	0.0374783	-3.57	0.00036	-0.1149	0.03514	-3.269	0.001086	0.561789	0.629637	0.892	0.372365
211121211111212112111111	40	0.00154	5.69364	4.77176	-0.2216	0.6569	-0.337	0.735814	0.0186408	0.0398427	0.468	0.639904	0.02351	0.03736	0.629	0.529081	0.056777	0.15568	0.365	0.71537
211111111112111121112121	41	0.00129	3.36708	5.3902	0.3604	0.753	0.479	0.632224	0.108752	0.0423113	2.57	0.010189	0.09893	0.03967	2.494	0.012672	-0.0518264	0.146881	-0.353	0.724239
111111111112111111211111	42	0.00114	4.09956	3.66032	-0.6434	0.7963	-0.808	0.419147	-0.0438692	0.048015	-0.914	0.36094	-0.05188	0.04502	-1.152	0.2492	-0.0320744	0.189825	-0.169	0.865838
212111112221111211111112	43	0.00113	7.48253	0.143995	-4.191	2.68	-1.564	0.11787	-0.154418	0.0453382	-3.406	0.000664	-0.1633	0.04251	-3.843	0.000123	0.188076	0.817477	0.23	0.81806
122221112121121121122111	44	0.00112	7.48682	0.0818951	-4.652	3.55	-1.31	0.190058	-0.0974867	0.0455778	-2.139	0.03249	-0.1117	0.04273	-2.614	0.008974	0.217694	1.25904	0.173	0.862743
111112111122111211211211	45	0.00112	4.74949	2.83933	-0.7316	0.7744	-0.945	0.344791	-0.0740333	0.0498477	-1.485	0.137554	-0.03295	0.04674	-0.705	0.480806	0.387142	0.203154	1.906	0.05683
211121211111111122112111	46	0.0011	3.35132	4.12354	0.3375	0.772	0.437	0.66197	0.0146568	0.0496119	0.295	0.767678	0.02326	0.04651	0.5	0.617109	-0.0931227	0.153736	-0.606	0.544759
122221112111121121122121	47	0.00108	7.18652	0.140246	-3.647	2.749	-1.327	0.184616	-0.127665	0.0461109	-2.769	0.005649	-0.1124	0.04323	-2.601	0.00933	0.217956	0.762126	0.286	0.774918
111111111112111121122111	48	0.00102	3.79526	3.15182	-0.3589	0.7909	-0.454	0.649987	-0.0097255	0.0471937	-0.206	0.836739	0.02579	0.04425	0.583	0.560028	0.0701425	0.250292	0.28	0.779319
122221112111121121222111	49	0.00098	3.66766	2.97376	-0.2468	0.8418	-0.293	0.769366	-0.0513473	0.0605782	-0.848	0.396688	-0.03928	0.0568	-0.692	0.489178	0.155566	0.274892	0.566	0.571509
122221112111111121122111	50	0.00092	1.11771	5.08919	1.399	1.07	1.306	0.191393	0.115925	0.0612246	1.893	0.058355	0.05429	0.0574	0.946	0.344277	-0.234174	0.155926	-1.502	0.133292
122221112111211121122111	51	0.00089	1	4.99891	1.684	1.132	1.488	0.136827	0.0833584	0.0554025	1.505	0.132488	0.09913	0.05194	1.908	0.056387	0.0648741	0.135903	0.477	0.633159
211121211122111211211211	52	0.00086	3.34911	2.50066	-0.4447	0.8844	-0.503	0.615108	-0.0633573	0.0571558	-1.109	0.267696	-0.0474	0.05359	-0.885	0.37646	-0.654842	0.239661	-2.732	0.006341
111111111112111221112121	53	0.00084	2.82277	2.86873	0.5332	0.9407	0.567	0.570889	-0.0297939	0.0648659	-0.459	0.646027	-0.002544	0.06082	-0.042	0.966639	0.109508	0.189468	0.578	0.56334
XXXXXXXXXXXXXXXXXXXXXXXX	Rare	0.03665	140.931	107.627	-0.2831	0.1502	-1.885	0.059409	-0.0168095	0.0091459	-1.838	0.066128	-0.005171	0.008575	-0.603	0.546494	0.0988921	0.034436	2.872	0.004123
